# Supplementary material for: Fabrication and simulation of a layered ultrahigh thermal conductive material made of self-assembled graphene and polydopamine on a copper substrate
Source: Royal Society of Chemistry journal article supplement (doi:10.1039/d1ra05252g), 2021-01-01
Supplement: d1ra05252g1.pdf [file d1ra05252g1.pdf]

## Supplementary Information

Table S1 Scheme of factors and levels of orthogonal experiment

|         | Immersion time in dopamine solution (min) | Immersion time in GO suspension (h) | Annealing temperature (°C) | Annealing time (h) |
|---------|-------------------------------------------|-------------------------------------|----------------------------|--------------------|
| Level 1 | 20                                        | 2                                   | 100                        | 0.5                |
| Level 2 | 40                                        | 4                                   | 200                        | 1                  |
| Level 3 | 60                                        | 6                                   | 300                        | 2                  |

Table S2 Orthogonal experimental table, four factors and three levels

| Experiment number | Immersion time in dopamine solution (min) | Immersion time in GO aqueous suspension (h) | Annealing temperature (°C) | Annealing time (h) |
|-------------------|-------------------------------------------|---------------------------------------------|----------------------------|--------------------|
| 1                 | 20                                        | 2                                           | 100                        | 0.5                |
| 2                 | 20                                        | 4                                           | 200                        | 1                  |
| 3                 | 20                                        | 6                                           | 300                        | 2                  |
| 4                 | 40                                        | 2                                           | 200                        | 2                  |
| 5                 | 40                                        | 4                                           | 300                        | 0.5                |
| 6                 | 40                                        | 6                                           | 100                        | 1                  |
| 7                 | 60                                        | 2                                           | 300                        | 1                  |
| 8                 | 60                                        | 4                                           | 100                        | 2                  |
| 9                 | 60                                        | 6                                           | 200                        | 0.5                |

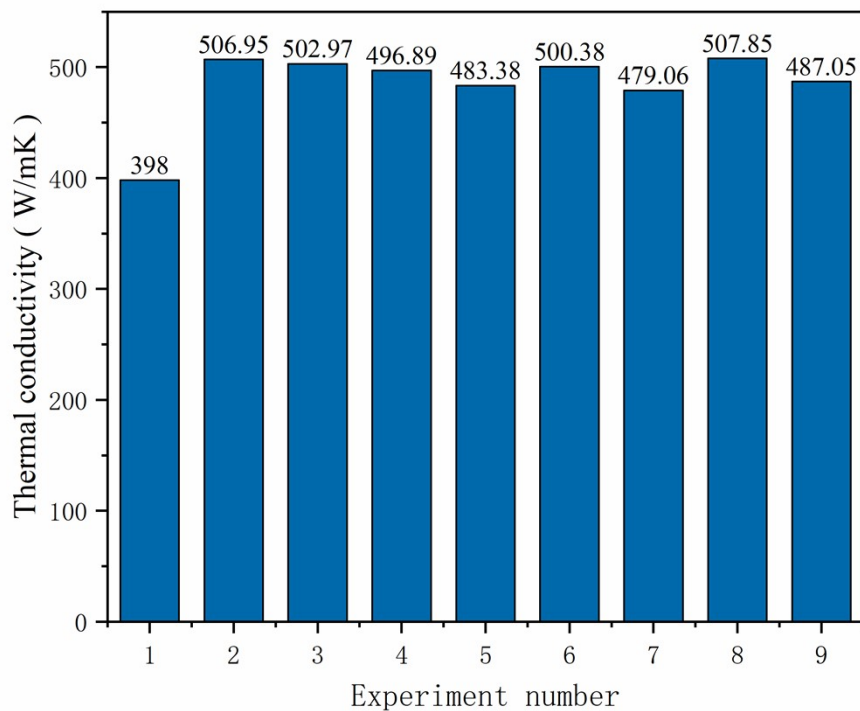

Fig. S1 The thermal conductivity of Cu substrate (a) and the samples in Table S2

Table S3 Further experiment

| Experiment number | Immersion time in dopamine solution (min) | Immersion time in GO suspension (h) | Immersion time in aqueous suspension (h) | Annealing temperature (°C) | Annealing time (h) |
|-------------------|-------------------------------------------|-------------------------------------|------------------------------------------|----------------------------|--------------------|
| 10                | 60                                        | 1                                   |                                          | 200                        | 1                  |
| 11                | 60                                        | 2                                   |                                          | 200                        | 1                  |
| 12                | 80                                        | 1                                   |                                          | 200                        | 1                  |
| 13                | 80                                        | 2                                   |                                          | 200                        | 1                  |
| 14                | 60                                        | 0.5                                 |                                          | 200                        | 1                  |

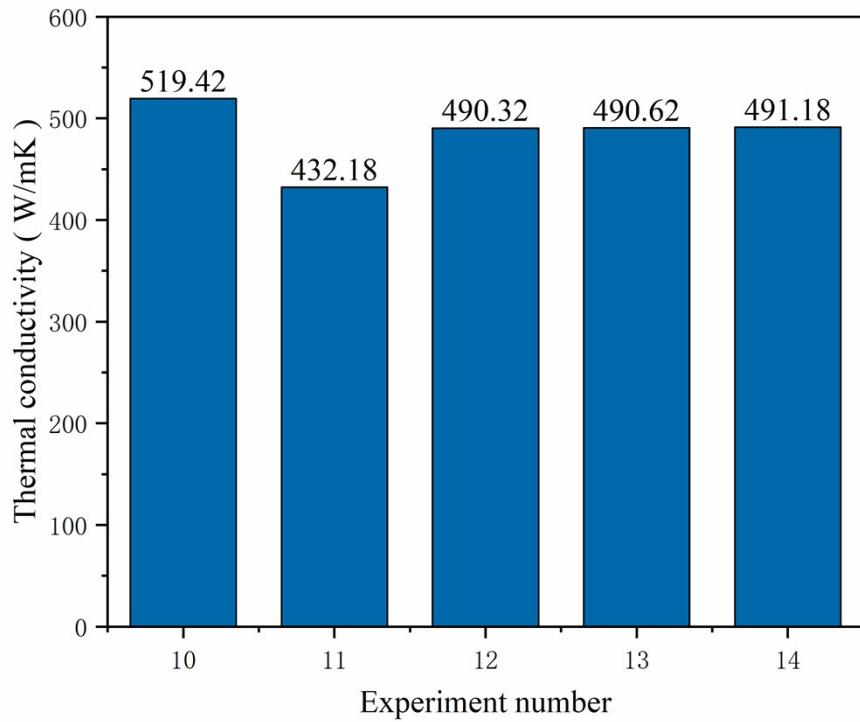

Fig.S2 The thermal conductivity of Cu substrate (a) and the samples in Table S3

Table S4 GO Immersion Test

| Experiment number | Immersion time in dopamine solution (min) | Immersion time in GO suspension (h) | Immersion time in aqueous solution (h) | Annealing temperature (°C) | Annealing time (h) |
|-------------------|-------------------------------------------|-------------------------------------|----------------------------------------|----------------------------|--------------------|
| 10                | 60                                        | 1                                   |                                        | 200                        | 1                  |
| 11                | 60                                        | 2                                   |                                        | 200                        | 1                  |
| 12                | 60                                        | 3                                   |                                        | 200                        | 1                  |
| 13                | 60                                        | 4                                   |                                        | 200                        | 1                  |
| 14                | 60                                        | 5                                   |                                        | 200                        | 1                  |

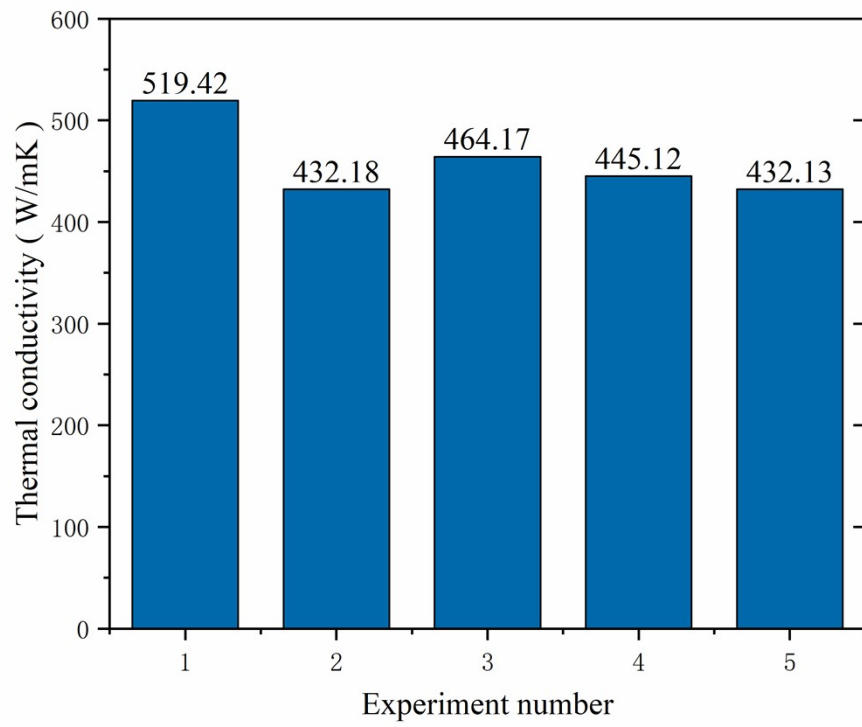

Fig.S3 The thermal conductivity of Cu substrate (a) and the samples in Table S4
